# Supplementary material
Source: PubMed Central journal article supplement (PMC3421817)
Supplement: JCM.01312-12_zjm999091927so4.pdf [file JCM.01312-12_zjm999091927so4.pdf]

## Neighbor-Net analysis using BIGSdb as implemented on PubMLST.org

The whole genome Neighbor-Net analysis described in this paper can be replicated with the following steps:

1. Navigate to the Neisseria database on PubMLST.org (<http://pubmlst.org/neisseria/>).
2. Select the isolate database:

**Navigation**

- **PubMLST**
- MLST Home
- Search / site map
- Download data
- Databases
- News
- **Software**
- Web tools
- Software
- **Recently updated**
- A. baumannii
- A. fumigatus
- Arcobacter
- B. cepacia
- B. cereus
- B. hyodysenteriae
- B. intermedia
- B. pilosicoli
- Bordetella
- Brachyspira
- C. difficile
- C. diphtheriae
- C. fetus
- C. helveticus
- C. insulaenigrae
- C. jejuni
- C. lari
- C. tropicalis
- C. upsaliensis
- Cronobacter
- H. pylori
- H. agalactiae
- Neisseria
- R. acne
- R. aeruginosa
- R. multocida (RIRDC)
- S. agalactiae
- S. zoepidemicus
- V. parahaemolyticus
- Wolbachia
- X. fastidiosa
- + **Mirrors**
- + **Developers**

**Neisseria Sequence Typing Home Page**

This MLST scheme uses two linked databases powered by the BIGSdb genomics platform. The sequence definition database contains allele sequence and MLST profile definitions whereas the isolate database contains provenance and epidemiological information. Further details about BIGSdb can be found in Jolley & Maiden 2010, *BMC Bioinformatics* **11**:595.

As well as MLST, the platform contains sequence data for other genetic targets, allowing MLST, *PorA*, *porB*, *FetA*, *fHbp*, *penA*, *ropB* and other sequences to be queried from the same interface.

- Information
- Access main databases
  - **Isolates**
  - Sequences and profile definitions
- Target genes/antigens
  - *PorA* (variable regions and alleles)
  - *porB*
  - *FetA* (variable region)
  - Factor H binding protein (alleles and peptides)
- Policy document
- Submission of data
- Submission history
- News and updates
- BIGSdb software
- Recent publications using MLST in Neisseria research

Database submissions - We are using an automated system for submitting MLST data to the database curators. Please ensure you use an up-to-date submission template. For other genetic targets please submit directly to the respective curators. [Instructions](#) | [Log in](#)

For submission of whole genome data please send assembled contigs in a FASTA file along with the standard isolate submission template to Keith Jolley.

Website and databases managed by Keith Jolley.

The use of this database is subject to the terms of the [policy document](#) and it should be acknowledged in all publications that make use of it. The preferred format for the acknowledgement can be found in the right-hand sidebar.

The primary Neisseria MLST website is hosted at the Department of Zoology, University of Oxford, UK. Initial development funded by the Wellcome Trust. Maintenance and database integration funded by EU-MenNet.

**Citing the database**

The preferred format for citing this website in publications is:

This publication made use of the Neisseria Multi Locus Sequence Typing website (<http://pubmlst.org/neisseria/>) developed by Keith Jolley and sited at the University of Oxford (Jolley & Maiden 2010, *BMC Bioinformatics*, **11**:595). The development of this site has been funded by the Wellcome Trust and European Union.

**Status**

**Sequence database**  
Sequences: 109735  
Profiles (MLST): 9501  
Last updated: 2012-07-04

**Isolate database**  
Isolates: 19395  
Last updated: 2012-07-04

3. Click 'Search database':

Query: Search | Browse | Profile/ST | List  
Breakdown: Isolate fields | Scheme/alleles | Publications  
Links: Contents | Home | Options | Profiles/sequences definitions | Database submissions

**Welcome to the Neisseria PubMLST database**

The Neisseria PubMLST database contains data for a collection of isolates that represent the total known diversity of Neisseria species. For every allelic profile in the profiles/sequence definition database there is at least one corresponding isolate deposited here. Any isolate may be submitted to this database and consequently it should be noted that it does not represent a population sample.

**Query database**

- **Search database** - advanced queries.
- Browse database - peruse all records.
- Search by combinations of loci (profiles) - including partial matching.
  - MLST
  - All loci
- List query - find isolates by matching a field to an entered list.

**Option settings**

- Set general options - including isolate table field handling
- Set display and query options for locus, schemes or scheme fields.

**General information**

- Isolates: 19395
- Last updated: 2012-07-04
- About BIGSdb

**Breakdown**

- Single field
- Two field
- Unique combinations
- Scheme and alleles
- Publications
- Sequence bin

**Export**

- Export dataset
- Concatenate alleles
- XMFA export

**Analysis**

- Codon usage
- Genome comparator
- BLAST

**Miscellaneous**

- Description of database fields

4. Click the filters list:

The screenshot shows the Neisseria PubMLST database search interface. At the top, there are navigation links: Query, Search, Browse, Profile/ST, List, Breakdown, Isolate fields, Scheme/alleles, Publications, and Links: Contents, Home, Options, Profiles/sequences definitions, Database submissions. Below this is a search bar with 'Toggle: ? Field help: id' and a 'Go' button. The main heading is 'Search Neisseria PubMLST database'. Underneath, there are sections for 'Isolate provenance/phenotype fields' (with a dropdown menu showing 'id' and an equals sign), 'Display/sort options' (with 'Order by: id' and 'ascending', and 'Display: 25 records per page'), and 'Allele designations/scheme fields' (with 'Tagged sequences' and 'Filters' tabs). The 'Filters' tab is highlighted with a red box. There are 'Reset' and 'Submit' buttons at the bottom.

5. Select the Feavers *et al.* 1999 paper from the publication filter list and click 'Submit':

The screenshot shows the Neisseria PubMLST database search interface, similar to the previous one. The 'Filters' tab is selected. Within the 'Filters' section, the 'Publication' dropdown menu is highlighted with a red box and contains the text 'Feavers et al. 1999 J Clin Microbiol 37'. Below the 'Publication' dropdown are other filter options: 'Project', 'MLST profiles', 'clonal complex (MLST)', 'Ribosomal MLST profiles', and 'Linked sequence', each with a dropdown menu. There are 'Reset' and 'Submit' buttons at the bottom.

- The records for isolates from the outbreak will be displayed. Click the 'Genome Comparator' button at the bottom of the table:

PubMLST Query: Search | Browse | Profile/ST | List  
Breakdown: Isolate fields | Scheme/alleles | Publications  
Links: Contents | Home | Options | Profiles/sequences definitions | Database submissions

Toggle: [v] Field help: id [v] Go

### Search *Neisseria* PubMLST database

Isolate provenance/phenotype fields: id = [ ] [v]

Allele designations/scheme fields: Tagged sequences: Filters

Publication: Feavers et al. 1999 J Clin Microbiol 37 [v]  
Project: [v]  
MLST profiles: [v]  
clonal complex (MLST): [v]  
Linked sequence: [v]

Displaysort options: Order by: id [v] ascending [v]  
Display: 25 [v] records per page [v]

Reset [v] Submit [v]

12 records returned. Click the hyperlinks for detailed information.

| Isolate fields [v] |          |            |         |      |                              | MLST                          |           | Fingerprinting antigens |                             |          |          |         |
|--------------------|----------|------------|---------|------|------------------------------|-------------------------------|-----------|-------------------------|-----------------------------|----------|----------|---------|
| id                 | isolate  | aliases    | country | year | disease                      | species                       | serogroup | ST                      | clonal complex              | PorA_VR1 | PorA_VR2 | FerA_VR |
| 644                | L93/4286 | Z5417      | UK      | 1993 | invasive (unspecified/other) | <i>Neisseria meningitidis</i> | C         | 11                      | ST-11 complex/ET-37 complex | 5-1      | 10-4     | F3-6    |
| 662                | 2837     | M97/252508 | UK      | 1997 | invasive (unspecified/other) | <i>Neisseria meningitidis</i> | C         | 50                      | ST-11 complex/ET-37 complex | 5-1      | 10-4     | F3-6    |
| 663                | 2839     | M97/252455 | UK      | 1997 | invasive (unspecified/other) | <i>Neisseria meningitidis</i> | C         | 11                      | ST-11 complex/ET-37 complex | 2        |          | F3-6    |
| 664                | 2838     | M97/252456 | UK      | 1997 | carrier                      | <i>Neisseria meningitidis</i> | C         | 11                      | ST-11 complex/ET-37 complex | 2        |          | F3-6    |
| 665                | 2845     | M07/252797 | UK      | 1997 | carrier                      | <i>Neisseria meningitidis</i> | C         | 67                      | ST-11 complex/ET-37 complex | 5        | 2        | F1-1    |
| 666                | 2843     | M97/252847 | UK      | 1997 | carrier                      | <i>Neisseria meningitidis</i> | C         | 51                      | ST-11 complex/ET-37 complex | 19-3     | 15       | F5-5    |
| 667                | 2842     | M97/252848 | UK      | 1997 | carrier                      | <i>Neisseria meningitidis</i> | C         | 51                      | ST-11 complex/ET-37 complex | 19-3     | 15       | F5-5    |
| 669                | 2846     | M97/252836 | UK      | 1997 | carrier                      | <i>Neisseria meningitidis</i> | C         | 52                      | ST-11 complex/ET-37 complex | deleted  | deleted  | F1-30   |
| 670                | 2840     | M97/252535 | UK      | 1997 | invasive (unspecified/other) | <i>Neisseria meningitidis</i> | C         | 50                      | ST-11 complex/ET-37 complex | 5-1      | 10-4     | F3-6    |
| 671                | 2844     | M97/252781 | UK      | 1997 | invasive (unspecified/other) | <i>Neisseria meningitidis</i> | C         | 50                      | ST-11 complex/ET-37 complex | 5-1      | 10-4     | F3-6    |
| 672                | 2847     | M97/252943 | UK      | 1997 | invasive (unspecified/other) | <i>Neisseria meningitidis</i> | C         | 50                      | ST-11 complex/ET-37 complex | 5-1      | 10-4     | F3-6    |
| 698                | FAM18    | Z4259      | USA     | 1983 | invasive (unspecified/other) | <i>Neisseria meningitidis</i> | C         | 11                      | ST-11 complex/ET-37 complex | 5        | 2        | F1-30   |

Analysis tools:

Breakdown: Fields Two Field Codons Polymorphic sites Combinations Schemes/alleles Publications Sequence bin Tag status

Analysis: BURST **Genome Comparator**

Export: Dataset Concatenate XMFA

- The isolates will be pre-selected. Select 'FAM18' from the 'annotated genome' drop down list box:

PubMLST Query: Search | Browse | Profile/ST | List  
Breakdown: Isolate fields | Scheme/alleles | Publications  
Links: Contents | Home | Options | Profiles/sequences definitions | Database submissions

Toggle: [v] Show options

### Genome Comparator

Please select the required isolate ids and loci for comparison - use ctrl or shift to make multiple selections. In addition to selecting individual loci, you can choose to include all loci defined in schemes by selecting the appropriate scheme description. Alternatively, you can enter the accession number for an annotated reference genome and compare using the loci defined in that.

Isolates: 30) 14, 237) H44/76, 240) M058, 613) 22491, 638) G2136, 662) 2837, 663) 2839, 664) 2838

Loci: abcZ (NEIS1015), acsF (NEIS1279), acnA (NEIS1729), acnB (NEIS1492), adk (NEIS0767), serE

Schemes: All loci, Genetic Information Process, Metabolism, Typing, Other schemes, Loci not in schemes

Reference genome: Enter accession number: [v]  
**or choose annotated genome:** [v]  
or provide accession numbers: [v] Browse...

Parameters / options: Min % identity: 70 [v], Min % alignment: 50 [v], BLASTN word size: 15 [v], Use TBLASTX [v], Produce alignments (Clustal + XMFA) [v], Include ref sequences in alignment [v], Align all loci (not only variable) [v], Use tagged designations if available [v]

Restrict included sequences by: Sequence method: [v], Project: [v], Experiment: [v]

Reset [v] Submit [v]

8. The locus and scheme lists will be hidden when a genome is selected. Press 'Submit'.

PubMLST Query: Search | Browse | Profile/ST | List  
Breakdown: Isolate fields | Scheme/alleles | Publications  
Links: Contents | Home | Options | Profiles/sequences definitions | Database submissions

Genome Comparator Show options

Please select the required isolate ids and loci for comparison - use ctrl or shift to make multiple selections. In addition to selecting individual loci, you can choose to include all loci defined in schemes by selecting the appropriate scheme description. Alternatively, you can enter the accession number for an annotated reference genome and compare using the loci defined in that.

| Isolates                                                                                              | Reference genome                                                                                                  | Parameters / options                                                                                                                                                                                                                                                                                                                                                                           | Restrict included sequences by              |
|-------------------------------------------------------------------------------------------------------|-------------------------------------------------------------------------------------------------------------------|------------------------------------------------------------------------------------------------------------------------------------------------------------------------------------------------------------------------------------------------------------------------------------------------------------------------------------------------------------------------------------------------|---------------------------------------------|
| 30) 14<br>237) H44/76<br>240) MC58<br>613) Z2491<br>633) G2136<br>662) 2837<br>663) 2839<br>664) 2838 | Enter accession number:<br>or choose annotated genome:<br>FAM18 (Nm)<br>or upload Genbank/EMBL file:<br>Browse... | Min % identity: 70<br>Min % alignment: 50<br>BLASTN word size: 15<br><input type="checkbox"/> Use TBLASTX<br><input type="checkbox"/> Produce alignments (Clustal + XMFA)<br><input checked="" type="checkbox"/> Include ref sequences in alignment<br><input type="checkbox"/> Align all loci (not only variable)<br><input checked="" type="checkbox"/> Use tagged designations if available | Sequence method:<br>Project:<br>Experiment: |

Reset Submit

9. The analysis job will be submitted to the server job queue. Click the job hyperlink to display the job viewer page. This will auto-refresh until the analysis is completed:

PubMLST Query: Search | Browse | Profile/ST | List  
Breakdown: Isolate fields | Scheme/alleles | Publications  
Links: Contents | Home | Options | Profiles/sequences definitions | Database submissions

Genome Comparator Show options

This analysis has been submitted to the job queue.  
Please be aware that this job may take a long time depending on the number of comparisons and how busy the server is.  
[Follow the progress of this job and view the output.](#)

10. A Neighbor-Net will be generated and displayed at the bottom of the page. Various output files are hyperlinked including the distance matrix used to generate the network. This can be loaded in to stand-alone Splitstree for further manipulation.

|                |                                                  |      |         |   |   |   |   |   |   |   |   |   |   |   |   |
|----------------|--------------------------------------------------|------|---------|---|---|---|---|---|---|---|---|---|---|---|---|
| neb   NMC0448  | putative nemagglutinin/hemolysin-related protein | 1503 | 472359  | 1 | T | 1 | 1 | 1 | 2 | 3 | 3 | T | 1 | 1 | 1 |
| smf   NMC0108  | SMF-family protein                               | 1194 | 112899  | 1 | 2 | 2 | 2 | T | 1 | 1 | 1 | 1 | 2 | 2 | 2 |
| thiE   NMC2050 | thiamin-phosphate pyrophosphorylase              | 618  | 2104771 | 1 | 1 | 1 | 1 | 1 | T | T | T | 2 | 1 | 1 | 1 |
| tspA   NMC1829 | Neisseria-specific antigen protein, TspA         | 2628 | 1861433 | 1 | T | 2 | 3 | 3 | 1 | 1 | 1 | T | 2 | 4 | 2 |
| tspB   NMC0283 | TspB protein                                     | 1632 | 283285  | 1 | T | T | T | T | X | T | T | T | T | T | T |
| uppS   NMC0177 | putative undecaprenyl diphosphate synthase       | 774  | 172821  | 1 | 2 | 2 | 2 | 2 | 3 | 1 | 1 | T | 2 | 2 | 2 |

**Unique strains**

Unique strains: 11

| Strain 1   | Strain 2   | Strain 3   | Strain 4   | Strain 5   | Strain 6       | Strain 7   | Strain 8   | Strain 9   | Strain 10  | Strain 11  |
|------------|------------|------------|------------|------------|----------------|------------|------------|------------|------------|------------|
| 671 (2844) | 666 (2843) | 663 (2839) | 669 (2846) | 662 (2837) | 644 (L9314286) | 672 (2847) | 664 (2838) | 670 (2840) | 667 (2842) | 665 (2845) |

- [Main output file](#)
- [Distance matrix \(Nexus format\)](#) - Suitable for loading in to [SplitsTree](#). Distances between taxa are calculated as the number of loci with different allele sequences
- [Splits graph \(Neighbour-net, PNG format\)](#)

(click to enlarge)

- [Splits graph \(Neighbour-net, SVG format\)](#) - This can be edited in [Inkscape](#) or other vector graphics editors

Please note that job results will remain on the server for 7 days.
